# Supplementary material for: Glycogen Synthase Kinase 3β (GSK3β) Regulates Myogenic Differentiation in Skeletal Muscle Satellite Cells of Sheep
Source: MDPI journal article supplement (doi:10.3390/ani12202789), 2022-10-15
Supplement: s1 [file s1]

Table S1: Primer sequences used in this study.

| Gene name | Primer sequence (5'–3') | T <sub>m</sub> (°C) |
|-----------|-------------------------|---------------------|
| GSK3B     | ATGTCAGGGCGGCCAGAA      | 63                  |
|           | TCAGGAGGAGTCGGAAGC      |                     |
| MyHC2a    | TTTGGGGAGGCTGCTCCTTA    | 61                  |
|           | AAAGATTCCTTGGGCTCGGC    |                     |
| MyHC1     | GAGCTCACGTACCAGACAGAG   | 60                  |
|           | CAGACCAAGAAGACGTGGCA    |                     |
| MyoD      | GCTCCAGAACCGCAGTAAGTT   | 61                  |
|           | CGGCGACAGCAGCTCCATA     |                     |
| MyoG      | GAAGCGCAGACTCAAGAAGG    | 61                  |
|           | TGCAGGCGCTCTATGTACTG    |                     |
| GAPDH     | GGTCGGAGTGAACGGATTTG    | 60                  |
|           | TGGCAACGATGTCCACTTTG    |                     |
